# Supplementary material for: Genetic Characteristics and Pathogenicity of a Novel Porcine Epidemic Diarrhea Virus with a Naturally Occurring Truncated ORF3 Gene
Source: MDPI journal article supplement (doi:10.3390/v14030487), 2022-02-27
Supplement: s1 [file s1]

Table S1. Oligonucleotide primers used for amplification by reverse transcription polymerase chain reaction.

| Name        | Sequence (5'-3')         | Nucleotide position | Product size(bp) |
|-------------|--------------------------|---------------------|------------------|
| PEDV-M-F    | CTCGGCTTGCATCACTCTT      | 25937               | 225              |
| PEDV-M-R    | GACCCAGTAGCAACCTTAT      | 26161               |                  |
| PEDV-ORF3-F | GTCCTAGACTTCAACCTTACGAAG | 24744               | 740              |
| PEDV-ORF3-R | AACTACTAGACCATTATCATTAC  | 25483               |                  |
| 1F          | CGCCTACGGATAGTTAGCTCT    | 20                  | 1601             |
| 1R          | CAGCGATACTAAGAGTGGCAC    | 1620                |                  |
| 2F          | CGTTGTGCCACTCTTAGT       | 1602                | 1622             |
| 2R          | ATTGTGCCACCTTCCTCA       | 3223                |                  |
| 3F          | CCAAACCACCAGCACTCAA      | 2857                | 1208             |
| 3R          | CCCACGACCATAACCATCA      | 4064                |                  |
| 4F          | GGAGGCAAGGATAGTGGTCAT    | 3996                | 1897             |
| 4R          | GACATGGTGCCACTACAGGTT    | 5892                |                  |
| 5F          | CTGGTCAGCCTAGTGATTCAAG   | 5629                | 1895             |
| 5R          | GTCCTCAGCAACAGCAGCATT    | 7523                |                  |
| 6F          | CGTTGCAAGAGCACATTGGGT    | 7461                | 1668             |
| 6R          | CCTACTAGCATACTGACGCAG    | 9128                |                  |
| 7F          | GCCGCCAACTCTATCTCAA      | 9083                | 1924             |
| 7R          | AACTCCGCTCACCAACCAAT     | 11006               |                  |
| 8F          | GCGACATGGCACATACACA      | 10549               | 1419             |
| 8R          | GCTCGTCCACCCTCATTAT      | 11967               |                  |
| 9F          | GCTGGTTGTACCTCTGTCT      | 11617               | 1709             |
| 9R          | GGCAGGCAATTAGTCATAC      | 13325               |                  |
| 10F         | GATAGGTGCTTGTGAGGAG      | 13020               | 1847             |
| 10R         | GCACAACGCCATCATCAGA      | 14866               |                  |
| 11F         | CGGTCTGATGATGGCGTTGTT    | 14855               | 1435             |
| 11R         | CGTTACGTGCACCTGGATAGT    | 16289               |                  |
| 12F         | GCATGAACACAAGCCACGTCT    | 15595               | 1837             |
| 12R         | GTGACCCAACCAACCTCTAAC    | 17431               |                  |
| 13F         | GTGCAGGCTAATGAGGGTT      | 17161               | 1771             |
| 13R         | GGTGTAGGATCGTAATGGG      | 18931               |                  |
| 14F         | GCGTTGTATGCCAAGCGTAAAG   | 18887               | 1161             |
| 14R         | GGGGCTAACGTAATCCACACT    | 18904               |                  |
| 15F         | GATCATCTTGGTGCTGGCT      | 19933               | 766              |
| 15R         | GTCGTGGTAGGCTAAGTGT      | 20698               |                  |
| 16F         | GAAGGTAAGTTGCTAGTGCGTAA  | 20507               | 2351             |
| 16R         | AGGTAGCCAATACTGCCAGATTT  | 22920               |                  |
| 17F         | GTGGCCTGTGTTGGTGTATAG    | 22866               | 2122             |
| 17R         | GGTGCCTCAAAGAAGACGCTT    | 24987               |                  |
| 18F         | GGCGTCCTAGACTTCAACCTT    | 24740               | 849              |
| 18R         | GGACTGCGCTATTACACAACC    | 25588               |                  |
| 19F         | ACGGAGCTTCTTGATGGCA      | 25355               | 2105             |
| 19R         | ACGTCAGACTTTGGCACAG      | 27460               |                  |
| 20F         | CAAGTCTCGTAACCAGTCC      | 26975               | 1059             |
| 20R         | CCCTCCATATCAACACCGT      | 28033               |                  |
